# Supplementary material for: Estimation of Hg(II) in Soil Samples by Bioluminescent Bacterial Bioreporter E. coli ARL1, and the Effect of Humic Acids and Metal Ions on the Biosensor Performance
Source: PubMed Central journal article supplement (PMC7308967; doi:10.3390/s20113138), 2020-06-02
Supplement: sensors-20-03138-s001.pdf [file sensors-20-03138-s001.pdf]

Supplementary material

## Estimation of Hg(II) in soil samples by bioluminescent bacterial bioreporter *E. coli* ARL1, effect of humic acids and metal ions on the biosensor performance

Irena Brányíková<sup>1</sup>, Simona Lucáková<sup>1,2</sup>, Gabriela Kuncová<sup>1,3</sup>, Josef Trögl<sup>3,\*</sup>, Václav Synek<sup>3</sup>, Jan Rohovec<sup>4</sup> and Tomáš Navrátil<sup>4</sup>

a)

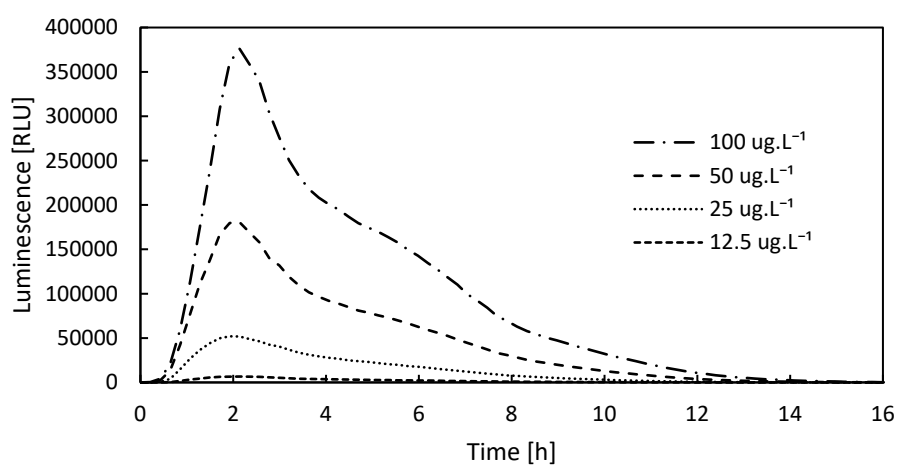

b)

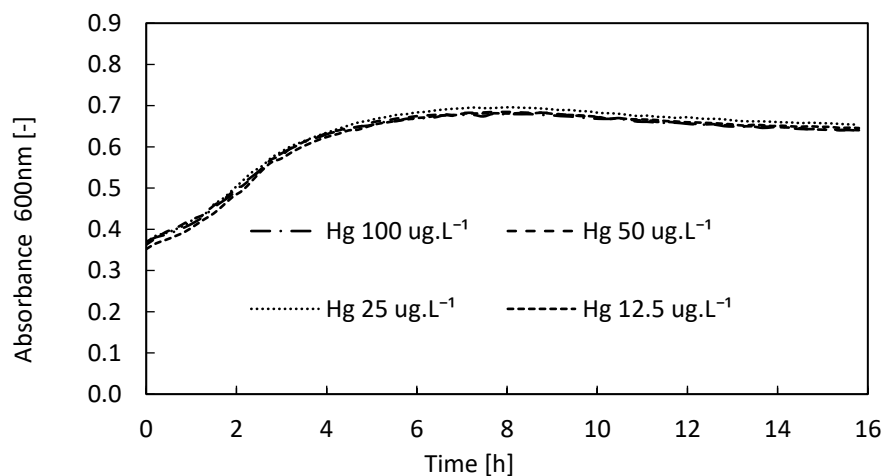

**Figure S1.** Sample bioluminescence response (a) and corresponding changes in the  $\text{OD}_{600}$  during the measurement.
